# Supplementary material for: Sleep duration, vegetable consumption and all-cause mortality among older adults in China: a 6-year prospective study
Source: Springer Nature journal article supplement (doi:10.1186/s12877-021-02278-8), 2021-06-21
Supplement: MOESM1 [file 19279508]

## Appendix

Table A1. Characteristics of study participants classified by sleep duration (weighted)

|                                           | Total | Hours of sleep per day |      |      |      |      | p-value |
|-------------------------------------------|-------|------------------------|------|------|------|------|---------|
|                                           |       | ≤5                     | 6    | 7-8  | 9    | ≥10  |         |
| % of the weighted sample                  | NA    | 12.1                   | 16.5 | 45.3 | 9.2  | 16.9 | NA      |
| <b>% Death in 2008-2014</b>               | 23.4  | 23.7                   | 21.2 | 21.2 | 24.0 | 30.6 | <0.001  |
| <b>Frequency of vegetable consumption</b> |       |                        |      |      |      |      |         |
| % High                                    | 92.0  | 89.3                   | 93.0 | 93.5 | 89.9 | 90.3 | <0.001  |
| <b>Demographics</b>                       |       |                        |      |      |      |      |         |
| Age (mean, years)                         | 73.3  | 74.0                   | 72.8 | 72.6 | 73.2 | 74.9 | <0.001  |
| % Aged over 80 years                      | 17.2  | 19.9                   | 15.3 | 14.3 | 17.3 | 25.1 | <0.001  |
| % Men                                     | 49.0  | 42.4                   | 45.2 | 49.3 | 54.5 | 53.3 | <0.001  |
| % Urban                                   | 39.0  | 38.3                   | 41.4 | 38.9 | 37.0 | 38.9 | <0.001  |
| <b>Socioeconomic factors</b>              |       |                        |      |      |      |      |         |
| % 0 years of schooling                    | 56.1  | 50.3                   | 60.1 | 58.3 | 55.5 | 50.8 | <0.001  |
| % Economic independence                   | 50.7  | 46.1                   | 53.9 | 54.4 | 47.2 | 42.6 | <0.001  |
| % Professional occupation                 | 12.6  | 10.8                   | 14.0 | 14.0 | 10.6 | 9.8  | <0.001  |
| % Access to healthcare                    | 93.6  | 88.7                   | 92.5 | 94.5 | 95.8 | 94.6 | <0.001  |
| <b>Family/Social support</b>              |       |                        |      |      |      |      |         |
| % Married                                 | 64.1  | 57.5                   | 66.1 | 66.6 | 65.6 | 59.4 | <0.001  |
| % Close proximity to children             | 84.8  | 80.9                   | 85.2 | 84.6 | 85.4 | 87.4 | <0.001  |
| <b>Health practice</b>                    |       |                        |      |      |      |      |         |
| % Doing regular exercise                  | 37.7  | 40.8                   | 39.4 | 39.1 | 35.5 | 31.2 | <0.001  |
| % Currently smoking                       | 24.9  | 23.6                   | 25.0 | 24.9 | 23.4 | 26.5 | <0.001  |
| <b>Health condition</b>                   |       |                        |      |      |      |      |         |
| % ADL disabled                            | 4.7   | 6.0                    | 4.5  | 3.0  | 2.9  | 9.3  | <0.001  |
| % Cognitively impaired                    | 14.3  | 16.7                   | 12.6 | 11.7 | 12.7 | 22.3 | <0.001  |
| % Self-reported poor health               | 49.1  | 65.7                   | 56.5 | 45.7 | 42.9 | 45.2 | <0.001  |

Note: (1) NA: not applicable. (2) Age was measured in mean, whereas all other variables were measured in percentage. (3) Except for the total sample whose weighted proportion was calculated across sleep hours, weighted percentages for all other variables were calculated within each sleep hours. (4) Except for the variable death, all other variables were measured at baseline wave in 2008. (5) p values were based on chi-square tests (for categorical variables) except for mean age that was derived from analysis of variance.

Table A2. Relative hazards of subsequent mortality by sleep duration (per day) and vegetable consumption, CLHLS, the 2008–2014 panel

|                                           | Model I    | Model II   | Model III  | Model IV   | Model V    |
|-------------------------------------------|------------|------------|------------|------------|------------|
| <b>Sleeping hours/day</b>                 |            |            |            |            |            |
| ≤5 hours (7-8)                            | 1.18***    |            | 1.15***    | 1.14***    | 1.08*      |
| 6 hours (7-8)                             | 1.12***    |            | 1.11**     | 1.10**     | 1.06       |
| 9 hours (7-8)                             | 1.03       |            | 1.04       | 1.04       | 1.04       |
| ≥10 hours (7-8)                           | 1.27***    |            | 1.26***    | 1.25***    | 1.16***    |
| <b>Frequency of vegetable consumption</b> |            |            |            |            |            |
| High (low)                                |            | 0.81***    | 0.83***    | 0.86***    | 0.94*      |
| <b>Covariates</b>                         |            |            |            |            |            |
| <i>Demographics</i>                       |            |            |            |            |            |
| Age (mean, years)                         | 1.08***    | 1.08***    | 1.07***    | 1.07***    | 1.06***    |
| Men(women)                                | 1.23***    | 1.23***    | 1.31***    | 1.41***    | 1.47***    |
| Urban (rural)                             | 0.92***    | 0.92***    | 0.97       | 1.01       | 0.95*      |
| <i>Socioeconomic factors</i>              |            |            |            |            |            |
| 1+ years of schooling (0)                 |            |            | 0.97       | 1.00       | 1.05       |
| Economic independence (no)                |            |            | 0.74***    | 0.80***    | 0.80***    |
| Professional occupation (no)              |            |            | 1.11**     | 1.12**     | 1.09*      |
| Access to healthcare (no)                 |            |            | 0.85***    | 0.87***    | 0.92*      |
| <i>Family/Social support</i>              |            |            |            |            |            |
| Currently married (no)                    |            |            |            | 0.80***    | 0.81***    |
| Close proximity to children (no)          |            |            |            | 1.04       | 1.02       |
| <i>Health practice</i>                    |            |            |            |            |            |
| Doing regular exercise (no)               |            |            |            | 0.92**     | 0.96       |
| Currently smoking (no)                    |            |            |            | 0.69***    | 0.78***    |
| <i>Health condition</i>                   |            |            |            |            |            |
| ADL disabled (no)                         |            |            |            |            | 1.58***    |
| Cognitively impaired (no)                 |            |            |            |            | 1.45***    |
| Self-reported good health (no)            |            |            |            |            | 1.15***    |
| N (observations)                          | 24,556     | 24,556     | 24,556     | 24,556     | 24,556     |
| -log likelihood                           | 19529.7*** | 19552.4*** | 19448.2*** | 19311.5*** | 18902.5*** |

Note: Relative hazards were obtained from parametric survival analyses that included those lost to follow-up based on imputed data. The category of each variable in the parentheses is the reference group of that variable.

\*\*\*p<0.001, \*\*p<0.01, \*p<0.05, +p<0.1.

Table A3. Relative hazards of mortality for the interaction between sleeping hours (per day) and vegetable consumption, CLHLS, the 2008-2014 panel

|                                                  | Total       | Women       | Men         | Young<br>old | Oldest<br>old | Rural       | Urban       | Illiterate  | Literate    |
|--------------------------------------------------|-------------|-------------|-------------|--------------|---------------|-------------|-------------|-------------|-------------|
| <b>Panel A</b>                                   |             |             |             |              |               |             |             |             |             |
| ≤5 hours and not often eating vegetables         | 1.08*       | 1.07        | 1.10+       | 0.89         | 1.08*         | 1.07        | 1.08        | 1.08+       | 1.08        |
| 6 hours and not often eating vegetables          | 1.06        | 1.07        | 1.05        | 0.95         | 1.07+         | 1.04        | 1.08        | 1.05        | 1.07        |
| <b>7-8 hours and not often eating vegetables</b> | <b>1.00</b> | <b>1.00</b> | <b>1.00</b> | <b>1.00</b>  | <b>1.00</b>   | <b>1.00</b> | <b>1.00</b> | <b>1.00</b> | <b>1.00</b> |
| 9 hours and not often eating vegetables          | 1.04        | 1.11+       | 0.97        | 0.80         | 1.07          | 1.04        | 0.97        | 1.08        | 0.96        |
| ≥10 hours and not often eating vegetables        | 1.16***     | 1.17***     | 1.15***     | 1.11         | 1.18***       | 1.15***     | 1.17***     | 1.17***     | 1.13*       |
| High frequent intake of vegetables(low)          | 0.93*       | 0.98        | 0.88**      | 1.03         | 0.93*         | 0.97        | 0.89**      | 0.93*       | 0.96        |
| <b>Panel B</b>                                   |             |             |             |              |               |             |             |             |             |
| ≤5 hours and not often eating vegetables         | 1.30**      | 1.31**      | 1.31*       | 0.95         | 1.30**        | 1.33**      | 1.23        | 1.32**      | 1.21        |
| 6 hours and not often eating vegetables          | 1.02        | 1.02        | 1.02        | 1.26         | 1.01          | 1.00        | 1.05        | 1.09        | 0.81        |
| <b>7-8 hours and not often eating vegetables</b> | <b>1.00</b> | <b>1.00</b> | <b>1.00</b> | <b>1.00</b>  | <b>1.00</b>   | <b>1.00</b> | <b>1.00</b> | <b>1.00</b> | <b>1.00</b> |
| 9 hours and not often eating vegetables          | 0.93        | 0.89        | 0.98        | 0.92         | 0.92          | 0.89        | 0.99        | 0.98        | 0.78        |
| ≥10 hours and not often eating vegetables        | 1.30***     | 1.34***     | 1.23*       | 1.12         | 1.31***       | 1.19*       | 1.43***     | 1.29***     | 1.27+       |
| ≤5 hours and often eating vegetables             | 1.04        | 1.09        | 0.97        | 0.97         | 1.04          | 1.02        | 1.06        | 1.04        | 1.03        |
| 6 hours and often eating vegetables              | 1.07        | 1.15*       | 0.97        | 1.01         | 1.09          | 1.06        | 1.09        | 1.06        | 1.09        |
| 7-8 hours and often eating vegetables            | 1.01        | 1.07        | 0.92        | 1.10         | 1.01          | 1.01        | 1.00        | 1.02        | 0.98        |
| 9 hours and not eating vegetables                | 1.07        | 1.21*       | 0.89        | 0.86         | 1.09          | 1.14        | 0.97        | 1.11        | 0.96        |
| ≥10 hours and often eating vegetables            | 1.15*       | 1.21**      | 1.06        | 1.22         | 1.14*         | 1.16*       | 1.13        | 1.16*       | 1.08        |
| <b>Panel C</b>                                   |             |             |             |              |               |             |             |             |             |
| ≤5 hours and not often eating vegetables         | 1.29***     | 1.23**      | 1.42**      | 0.87         | 1.30**        | 1.32**      | 1.22+*      | 1.30**      | 1.24        |
| 6 hours and not often eating vegetables          | 1.02        | 0.97        | 1.11        | 1.13         | 1.00          | 0.99        | 1.06+       | 1.08        | 0.82        |
| 7-8 hours and not often eating vegetables        | 0.99        | 0.94        | 1.08        | 0.91         | 0.99          | 0.99        | 1.00        | 0.98        | 1.02        |
| 9 hours and not often eating vegetables          | 0.92        | 0.83        | 1.06        | 0.84         | 0.92          | 0.88        | 0.99        | 0.96        | 0.80        |
| ≥10 hours and not often eating vegetables        | 1.28***     | 1.25***     | 1.34***     | 1.02         | 1.30***       | 1.18**      | 1.43***     | 1.27***     | 1.29**      |
| ≤5 hours and often eating vegetables             | 1.03        | 1.02        | 1.05        | 0.89         | 1.03          | 1.01        | 1.06        | 1.02        | 1.06        |
| 6 hours and often eating vegetables              | 1.06+       | 1.08        | 1.05        | 0.92         | 1.08+         | 1.05        | 1.09        | 1.06        | 1.11+       |
| <b>7-8 hours and often eating vegetables</b>     | <b>1.00</b> | <b>1.00</b> | <b>1.00</b> | <b>1.00</b>  | <b>1.00</b>   | <b>1.00</b> | <b>1.00</b> | <b>1.00</b> | <b>1.00</b> |
| 9 hours and not eating vegetables                | 1.06        | 1.14*       | 0.96        | 0.78         | 1.08+         | 1.12+       | 0.97        | 1.09+       | 0.99        |
| ≥10 hours and often eating vegetables            | 1.14***     | 1.14**      | 1.14**      | 1.11         | 1.14***       | 1.14***     | 1.13**      | 1.15*       | 1.10+       |
| N (observations)                                 | 24,556      | 13,918      | 10,638      | 6,887        | 17,669        | 13,689      | 10,867      | 15,358      | 9,198       |

Note: Relative hazards were obtained from parametric survival analyses that included those lost to follow-up based on imputed data. The reference group in Panel B is "7-8 hours and not often eating vegetables", whereas the reference group in Panel C is "7-8 hours and often eating vegetables." All models controlled for all covariates in Table 1. Relative hazards for all covariates were not presented. \*\*\*p<0.001, \*\*p<0.01, \*p<0.05, +p<0.1.
